# Supplementary material for: 3D genome organization in the epithelial-mesenchymal transition spectrum
Source: PubMed Central journal article supplement (PMC9150291; doi:10.1186/s13059-022-02687-x), 2022-05-30
Supplement: 13059_2022_2687_MOESM2_ESM.pdf [file 13059_2022_2687_MOESM2_ESM.pdf]

**Fig S1**

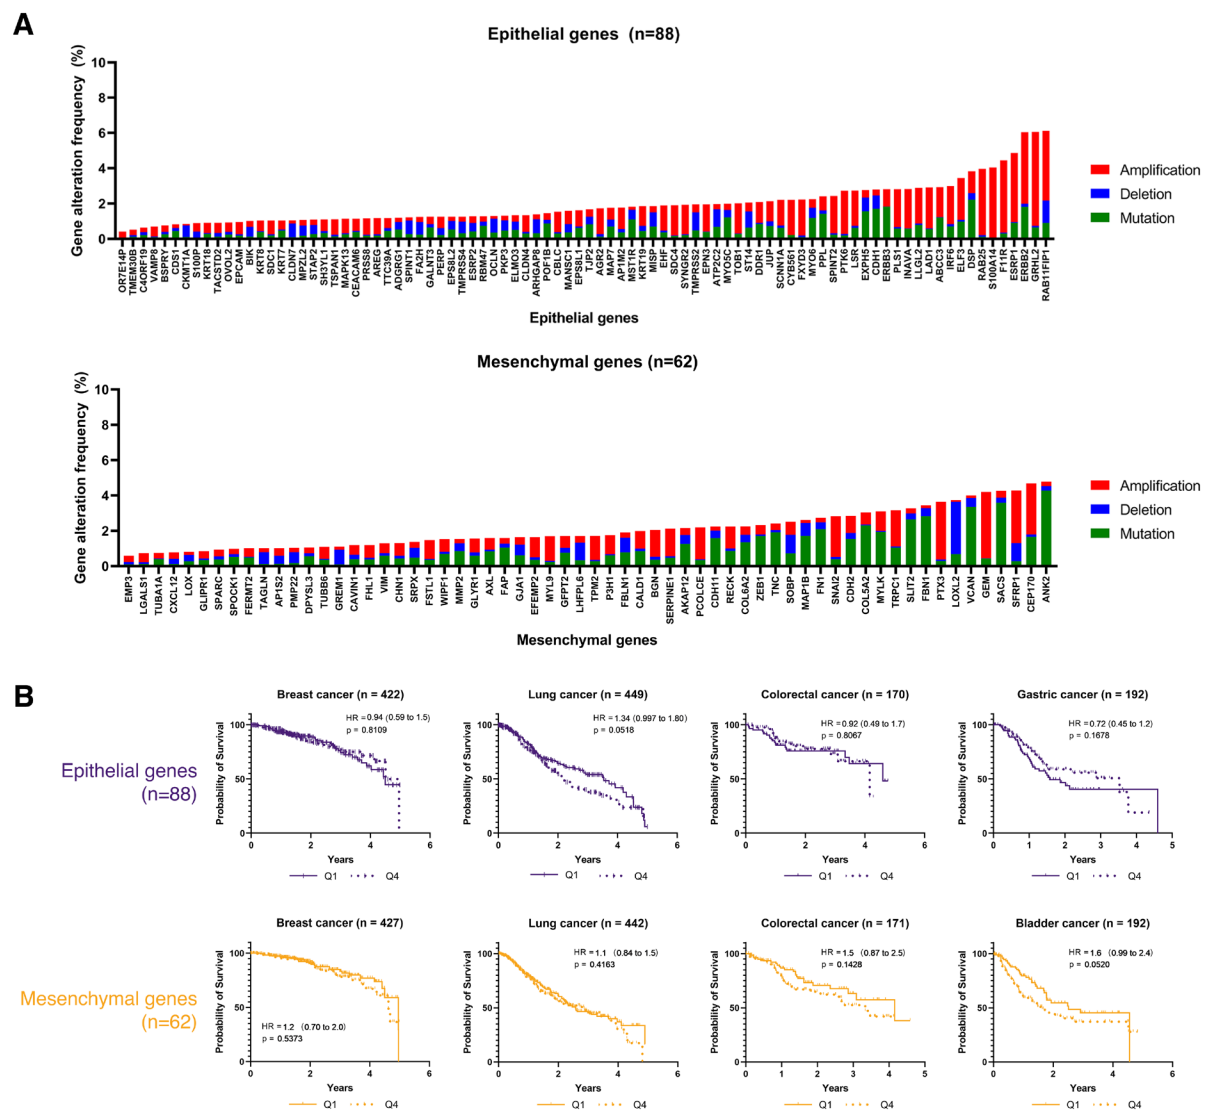

**Fig S1.** (a) Bar chart representations of the gene mutation and copy-number alteration frequency of EMT genes across pan-cancer tumours (n=8,510). (b) Kaplan-Meier survival analysis of epithelial (purple) or mesenchymal (orange) genes for 1st quartile (Q1 – solid lines) vs 4<sup>th</sup> quartile (Q4 – dotted lines) in breast, lung, colorectal, bladder, and gastric cancers.

**Fig S2**

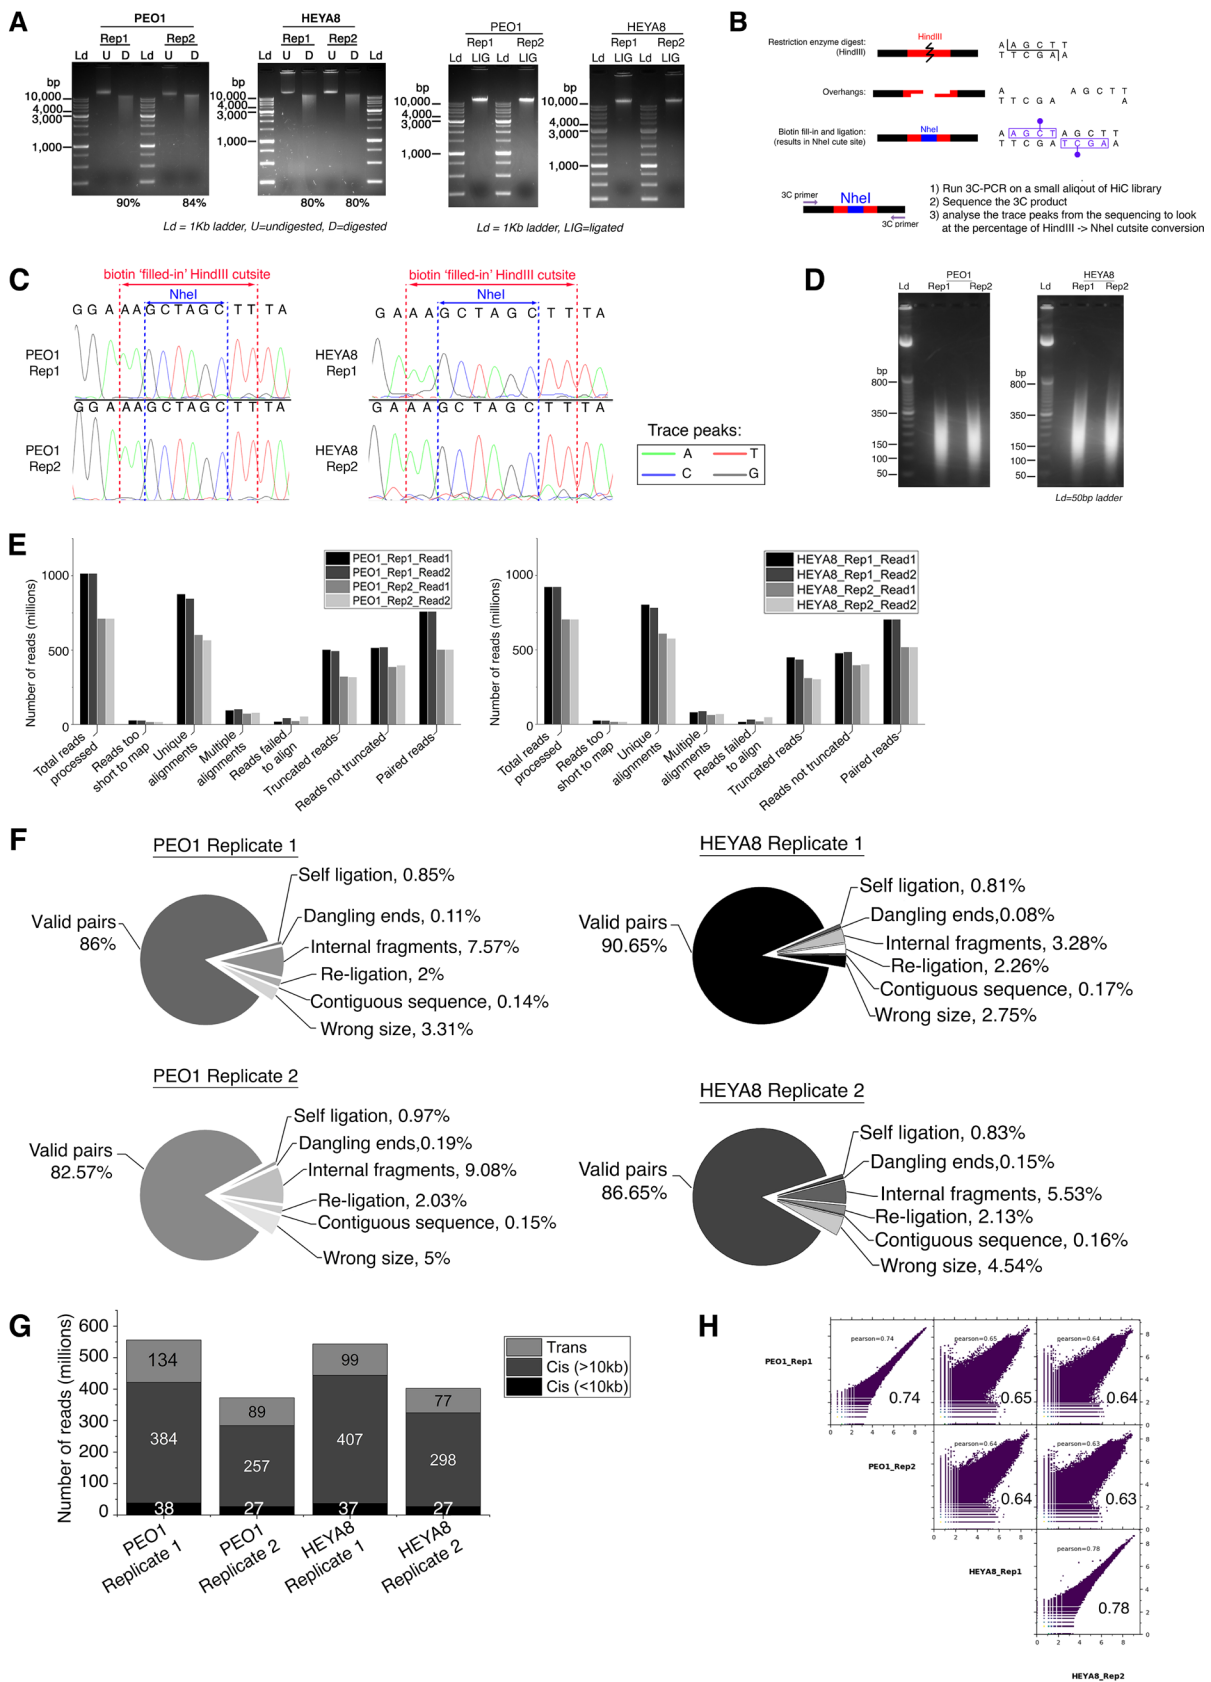

**Fig S2.** (a) Gel electrophoresis of digested Hi-C libraries, where 2 replicates of Hi-C libraries were performed in each cell line. Aliquots of the libraries were ran on a 1.2% gel against a 1Kb ladder (bp = basepairs). Replicates 1 and 2 of the Hi-C libraries are represented by ‘Rep1’ and ‘Rep2’ respectively. The digested libraries (D) were loaded next to the undigested libraries (U) to estimate the digestion efficiency. The digestion efficiency of the libraries was also checked using qPCR. The Hi-C libraries after proximity ligation step (LIG) were ran against a 1Kb ladder on a 1.2% gel. Replicates 1 and 2 of the Hi-C libraries are represented by ‘Rep1’ and ‘Rep2’ respectively. (b) Illustration of biotin fill-in in Hi-C workflow depicts the conversion of HindIII (red) to NheI (blue) to enrich the Hi-C contacts with biotinylated cut sites. (c) Sanger sequencing to check biotin fill in of Hi-C libraries. (d) Sonication profile of Hi-C libraries. (e) Mapping statistics of Hi-C libraries as processed by HiCUP. (f) Filtering of the mapped pair reads in PEO1 and HEYA8 Hi-C libraries. (g) Number of valid chromatin contacts available in PEO1 and HEYA8 Hi-C libraries. (h) Pairwise correlation of replicates 1 and 2 of PEO1 and HEYA8 Hi-C libraries. Pearson correlation of PEO1 Hi-C replicates 1 and 2 is 0.74, and HEYA8 Hi-C replicates 1 and 2 is 0.78. Pearson correlation values between replicates of the two different cell lines are also noted, respectively.

**Fig S3**

**A**

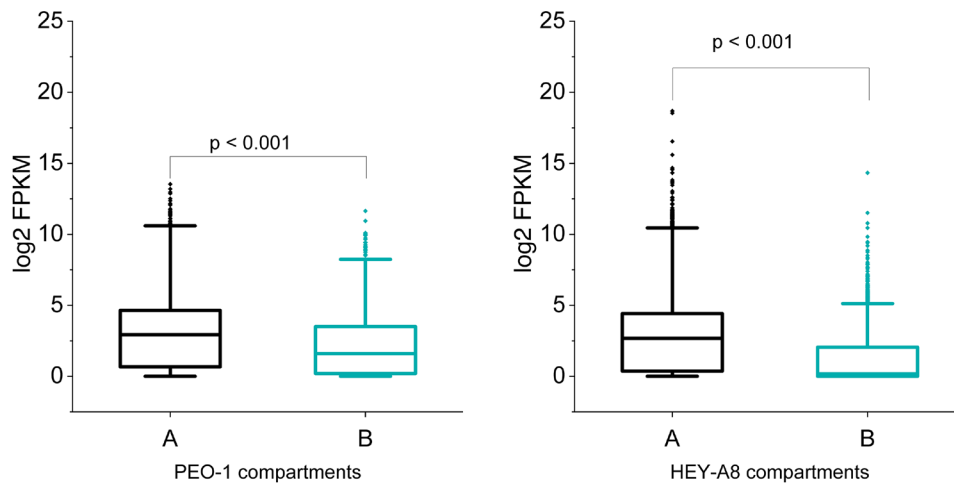

**B**

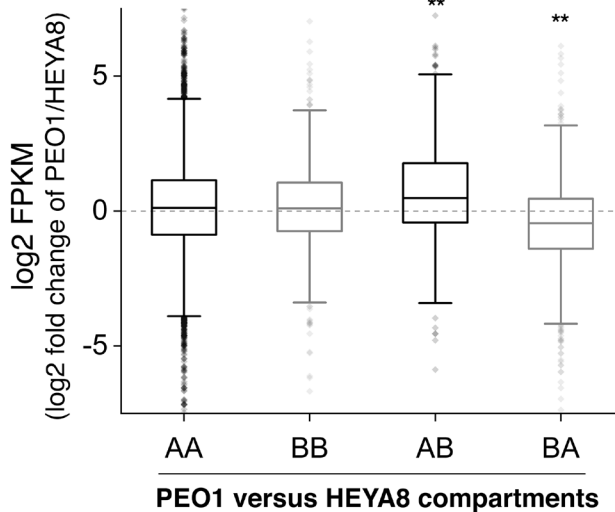

|    | #genes                |                   | Gene ontology<br>(GO complete biological process) |
|----|-----------------------|-------------------|---------------------------------------------------|
|    | not in<br>concordance | in<br>concordance |                                                   |
| AB | 387 (66%)             | 205 (34%)         | -                                                 |
| BA | 1061 (67%)            | 532 (33%)         | Cellular metabolic process, FDR=2.07E-13          |

**C**

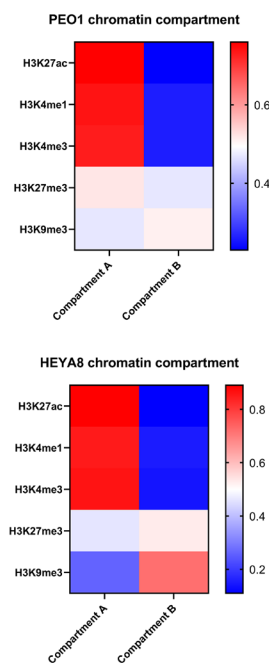

**Fig S3.** (a) Expression of genes (log<sub>2</sub> FPKM; y-axis) in chromosomal compartments (A and B; x-axis) of PEO1 (left) and HEYA8 (right). (b) Fold change of gene expression (log<sub>2</sub> FPKM; y-axis) between PEO1 and HEYA8, across the categories of changes in active (A) and inactive (B) chromosomal compartments (x-axis). Gene ontology of the genes in ‘BA’, genes that switched from inactive compartment in PEO1 to active compartment in HEYA8 were enriched in cellular metabolic processes (FDR = 2.07 × 10<sup>-13</sup>). (c) Correlation between histone marks (H3K27ac, H3K4me1, H3K4me3, H3K27me3, H3K9me3; y-axis) and chromatin

compartments A and B (x-axis) in PEO1 (top) and HEYA8 (bottom). Coloured heatmap (blue and red scale) indicating the Pearson correlation value.

**Fig S4**

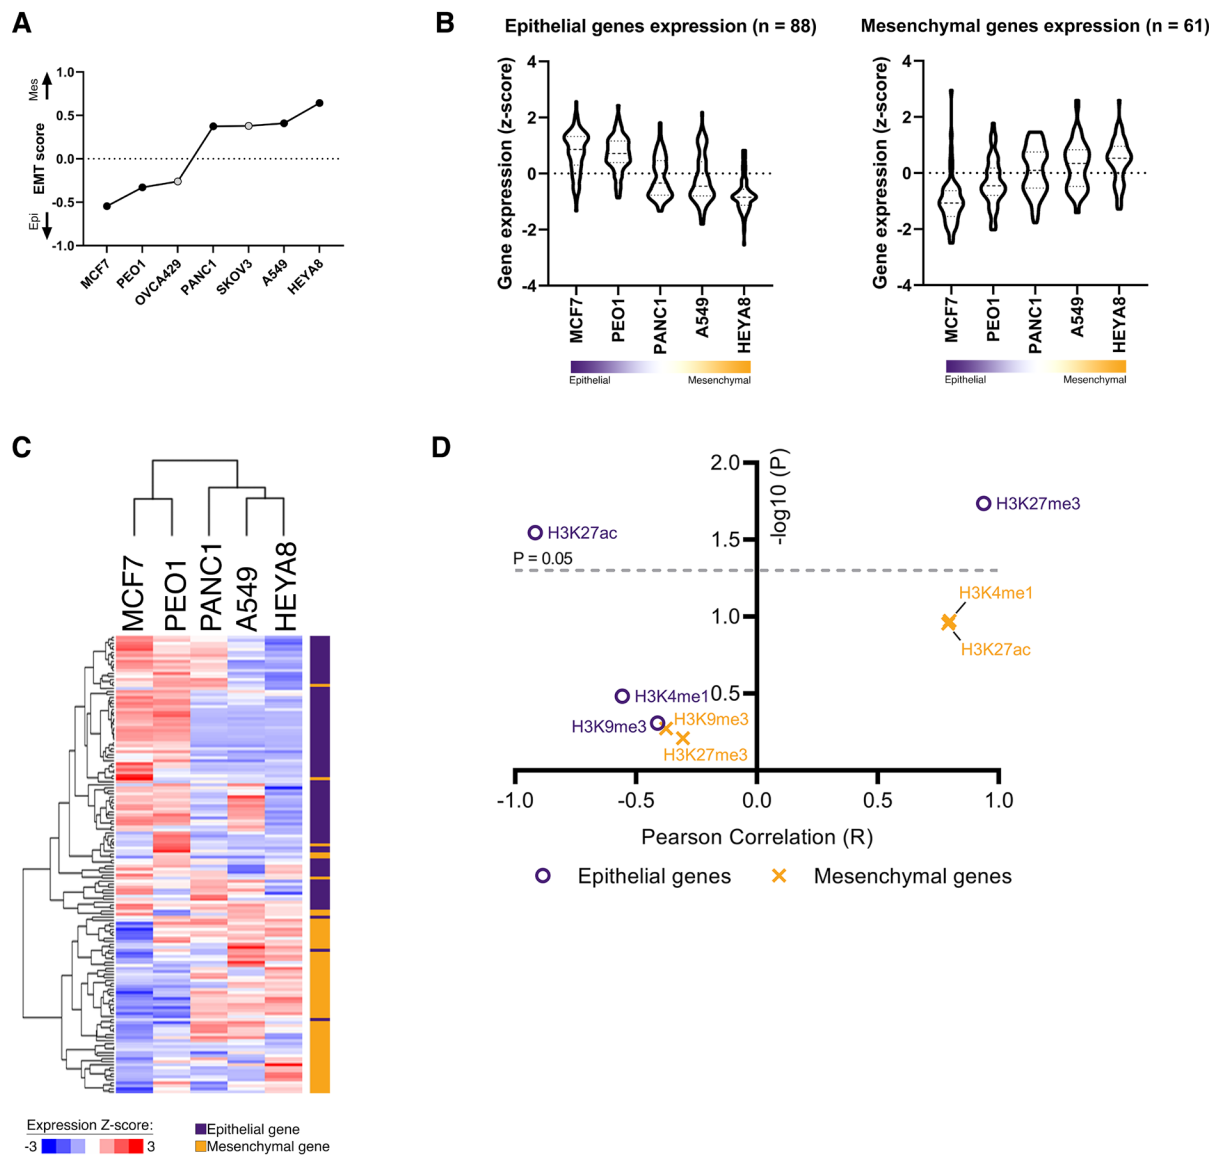

**Fig S4.** (a) EMT scores (y-axis) of cancer cell lines (x-axis; MCF7, PEO1, OVCA429, PANC1, SKOV3, A549, HEYA8). Epi: epithelial; Mes: mesenchymal (b) Violin plots showing expression of epithelial and mesenchymal genes in z-scores (y-axis) across the cancer cell lines (x-axis; MCF7, PEO1, PANC1, A549, HEYA8). Colour heatmap (purple to yellow) indicating the EMT spectrum. (c) Heatmap of unsupervised hierarchical clustering gene expression of epithelial (purple) and mesenchymal (yellow) genes in z-scores (blue and red colour scale) across the cancer cell lines (MCF7, PEO1, PANC1, A549, HEYA8). (d) Scatter plot showing the significance  $p$ -value levels (y-axis) and Pearson correlation  $R$  values (x-axis) between EMT

scores and average histone signals (H3K27ac, H3K4me1, H3K27me3 and H3K9me3) at epithelial (purple circle) and mesenchymal (yellow cross) genes.

Fig S5

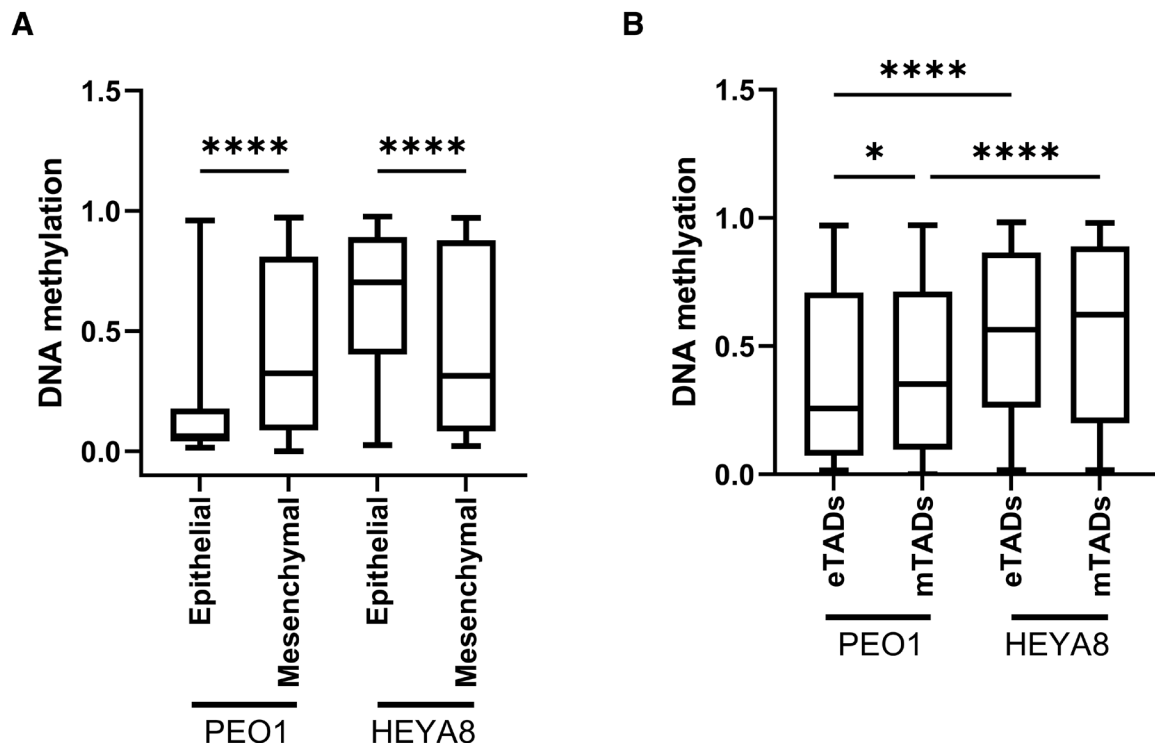

**Fig S5.** (a) Box plots showing DNA methylation (y-axis) of epithelial and mesenchymal genes within EMT TADs of PEO1 and HEYA8 (x-axis). (b) Box plots showing DNA methylation (y-axis) of epithelial TADs (eTADs) and mesenchymal TADS (mTADs) of PEO1 and HEYA8 (x-axis). \*\*\*\*  $p < 0.0001$ ; \*  $p < 0.05$



**Fig S6**

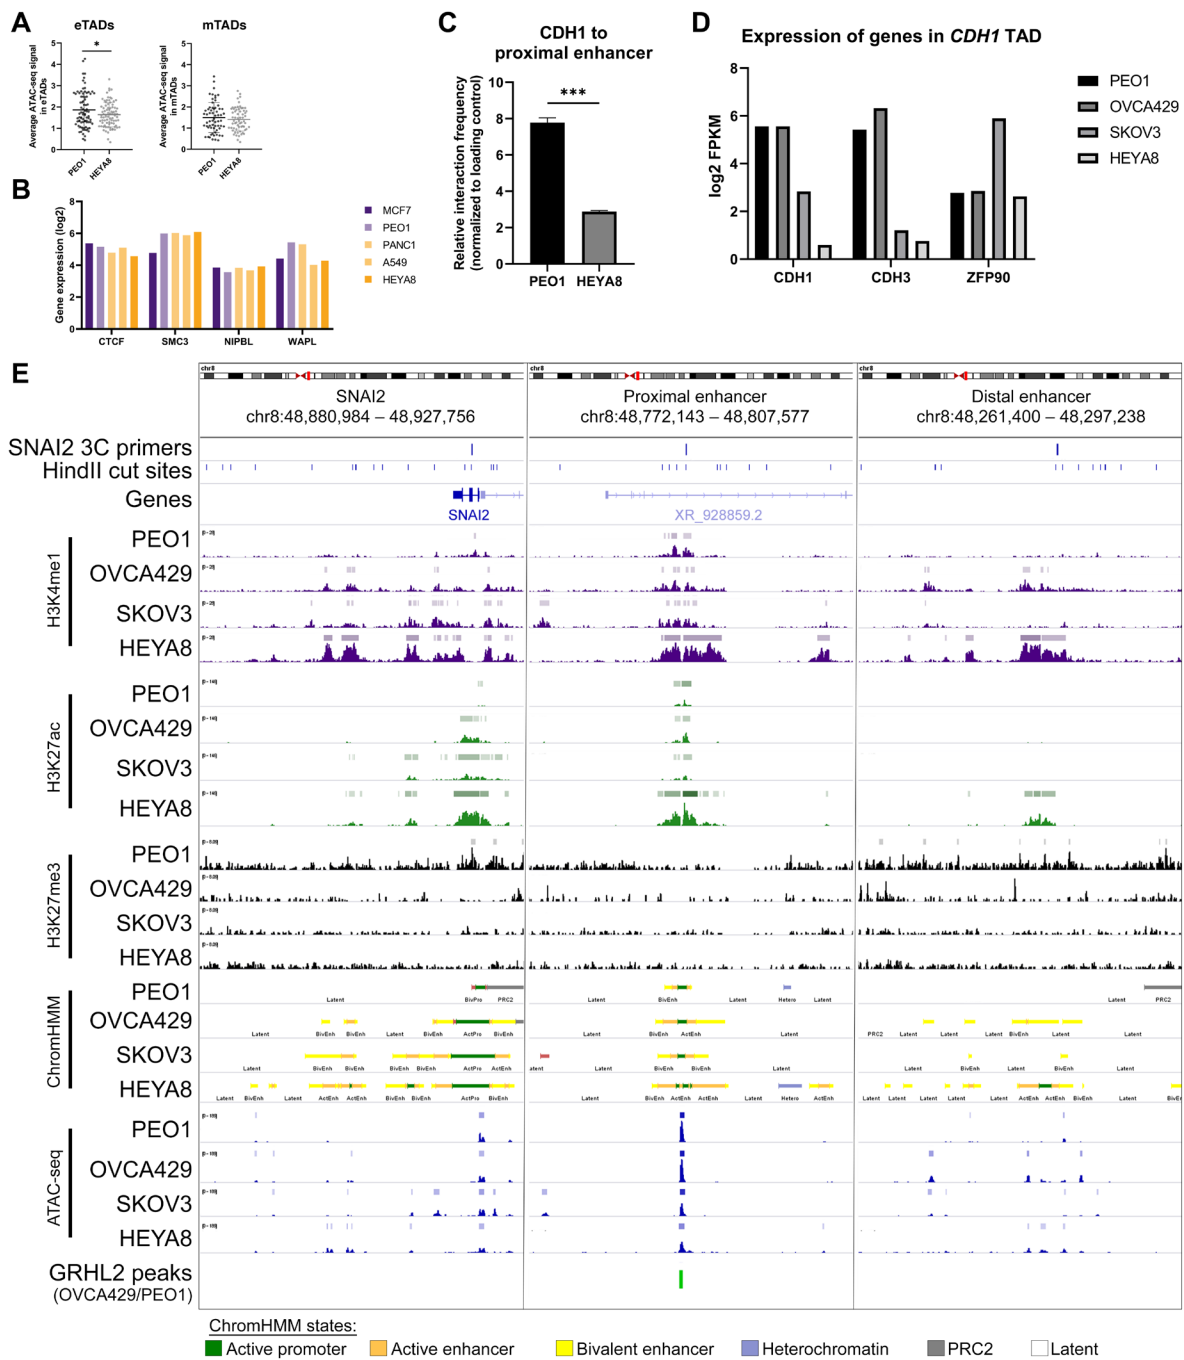

**Fig S6.** (a) Average ATAC-seq signal (y-axis) in eTADs (left) and mTADs (right) in PEO1 (black) and HEYA8 (gray).  $*p < 0.05$ , Student's T-test. (b) RNA-seq log<sub>2</sub> gene expression (y-axis) of CTCF, SMC3, NIPBL and WAPL in MCF7 (dark purple), PEO1 (light purple), PANC1 (pale yellow), A549 (light yellow), HEYA8 (dark yellow). (c) Bar chart showing 3C-qPCR normalized interaction frequencies (y-axis) between TSS of *CDH1* and its proximal

enhancer (5,400bp apart) in PEO1 (black) and HEYA8 (gray). \*\*\* $p < 0.001$ , Student's T-test.

(d) Bar chart showing  $\log_2$  FPKM (y-axis) of gene expression levels of CDH1, CDH3, and ZFP90 within the *CDH1* TAD in PEO1 (black), OVCA429 (dark gray), SKOV3 (gray), and HEYA8 (light gray).

(e) IGV browser view at 3 regions of SNAI2 locus: SNAI2 gene, SNAI2 proximal enhancer, and SNAI2 distal enhancer showing their respective genomic positions at chromosome 8 (chr8) (top panel and 3<sup>rd</sup> lane from top), 3C primer sites (1<sup>st</sup> lane from top), HindIII cut sites (2<sup>nd</sup> lane from top), and the peaks of histone marks, H3K4me1 (indigo), H3K27ac (green), H3K27me3 (black), across PEO1, OVCA429, SKOV3, and HEYA8. ChromHMM states (active promoter in green, active enhancer in orange, bivalent enhancer in yellow, heterochromatin in blue, PRC2 in gray, latent in white) and the ATAC-seq peaks (blue) in PEO1, OVCA429, SKOV3, and HEYA8 are shown below the IGV browser tracks followed by the GRHL2 binding peaks in both PEO1 and OVCA429 (bottom lane).

**Fig S7**

**A**

Single cell HiC libraries statistics

PEO1 + HEYA8 single cells

| Cell ID              | 1      | 2       | 3      | 4       | 5      | 6      | 7      | 8      | 9      | 10     | 11     | 12      |
|----------------------|--------|---------|--------|---------|--------|--------|--------|--------|--------|--------|--------|---------|
| Total contacts       | 16,238 | 152,989 | 60,249 | 147,336 | 17,883 | 76,609 | 83,750 | 47,382 | 96,943 | 90,997 | 87,928 | 140,931 |
| Ambiguous contacts   | -      | -       | -      | -       | -      | -      | -      | -      | -      | -      | -      | -       |
| Cis near (contacts)  | 235    | 45,849  | 11,132 | 49,030  | 428    | 26,151 | 28,261 | 11,261 | 32,736 | 29,873 | 34,433 | 31,189  |
| Cis far (contacts)   | 1,173  | 73,536  | 41,638 | 71,880  | 3,588  | 32,967 | 33,427 | 18,678 | 41,948 | 40,386 | 37,619 | 81,854  |
| Total cis (contacts) | 1,408  | 119,385 | 52,770 | 120,910 | 4,016  | 59,118 | 61,688 | 29,939 | 74,684 | 70,259 | 72,052 | 113,043 |
| Trans (contacts)     | 14,830 | 33,604  | 7,479  | 26,426  | 13,867 | 17,491 | 22,062 | 17,443 | 22,259 | 20,738 | 15,876 | 27,888  |

| Cell ID              | 13     | 14     | 15    | 16     | 17     | 18     | 19      | 20     | 21      | 22     | 23      | 24     |
|----------------------|--------|--------|-------|--------|--------|--------|---------|--------|---------|--------|---------|--------|
| Total contacts       | 97,576 | 22,808 | 7,237 | 45,557 | 13,413 | 98,327 | 119,797 | 29,112 | 104,708 | 44,218 | 139,944 | 68,425 |
| Ambiguous contacts   | -      | -      | -     | -      | -      | -      | -       | -      | -       | -      | -       | -      |
| Cis near (contacts)  | 25,100 | 4,499  | 59    | 394    | 78     | 23,861 | 31,532  | 52     | 27,449  | 189    | 33,439  | 17,313 |
| Cis far (contacts)   | 45,746 | 8,733  | 439   | 7,278  | 930    | 46,302 | 56,569  | 1,661  | 47,327  | 3,551  | 79,276  | 31,876 |
| Total cis (contacts) | 70,846 | 13,232 | 498   | 7,672  | 1,008  | 70,163 | 88,101  | 1,713  | 74,776  | 3,740  | 112,715 | 49,189 |
| Trans (contacts)     | 26,730 | 9,576  | 6,739 | 37,885 | 12,405 | 28,164 | 31,696  | 27,399 | 29,932  | 40,478 | 27,229  | 19,236 |

OVCA429 shGRHL2 Tet-inducible single cells

| Cell ID              | 43     | 44     | 49     | 56     | 84     | 86     | 89     | 90     | 93     |
|----------------------|--------|--------|--------|--------|--------|--------|--------|--------|--------|
| Total contacts       | 35,580 | 49,506 | 49,519 | 30,431 | 59,994 | 37,394 | 30,046 | 27,331 | 28,062 |
| Ambiguous contacts   | -      | -      | -      | -      | -      | -      | -      | -      | -      |
| Cis near (contacts)  | 14,769 | 18,149 | 15,815 | 10,092 | 16,218 | 12,395 | 10,353 | 9,059  | 6,476  |
| Cis far (contacts)   | 15,458 | 21,080 | 21,289 | 13,302 | 22,780 | 17,944 | 12,539 | 12,530 | 9,745  |
| Total cis (contacts) | 30,227 | 39,229 | 37,104 | 23,394 | 38,998 | 30,339 | 22,892 | 21,589 | 16,221 |
| Trans (contacts)     | 5,353  | 10,277 | 12,415 | 7,037  | 20,996 | 7,055  | 7,154  | 5,742  | 11,841 |

**B**

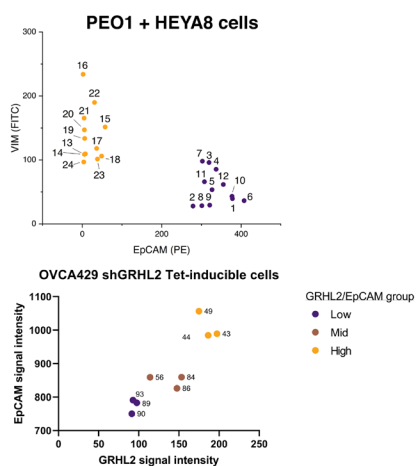

**C**

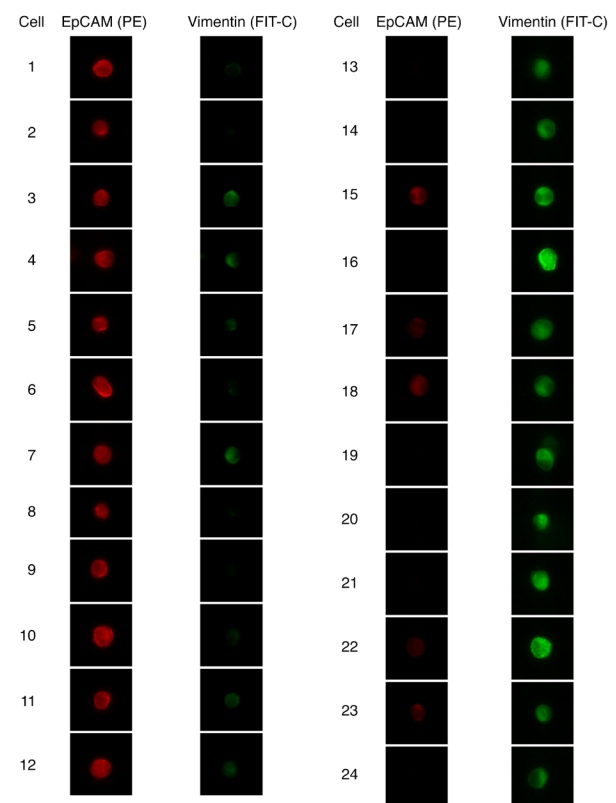

**D**

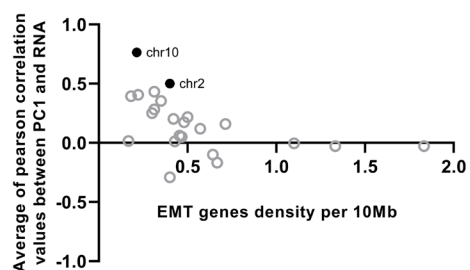

**Fig S7.** (a) Statistics of single cell Hi-C libraries of mapping and filtering of reads. (b) Scatterplot (top) of the fluorescence staining intensity signals of EpCAM (PE, x-axis) and VIM

(FITC, y-axis) in single cells isolated for Hi-C library construction, from the PEO1+HEYA8 population. Scatterplot (bottom) showing the fluorescence staining intensity signals of EpCAM (PE, y-axis) and GRHL2 (APC, x-axis) in single cells isolated from the doxycycline-treated OVCA429 shGRHL2 Tet-inducible cells. (c) Fluorescence staining images of EpCAM (PE, red) and VIM (FITC, green) in single cells isolated from the PEO1+HEYA8 population. Cell IDs are shown on the right of the staining images. (d) Scatterplot showing the density of EMT genes per 10Mb region on individual chromosomes (x-axis) with the average Pearson correlation values (correlation between chromosomal compartment PC1 and RNA-seq gene expression values) of EMT genes (y-axis) on each chromosome. Chromosomes 2 (chr2) and 10 (chr10) are denoted as black dots, while the other chromosomes are shown as gray circles.
